# Supplementary material for: Modeling target-density-based cull strategies to contain foot-and-mouth disease outbreaks
Source: PeerJ journal article supplement (doi:10.7717/peerj.16998), 2024-02-29

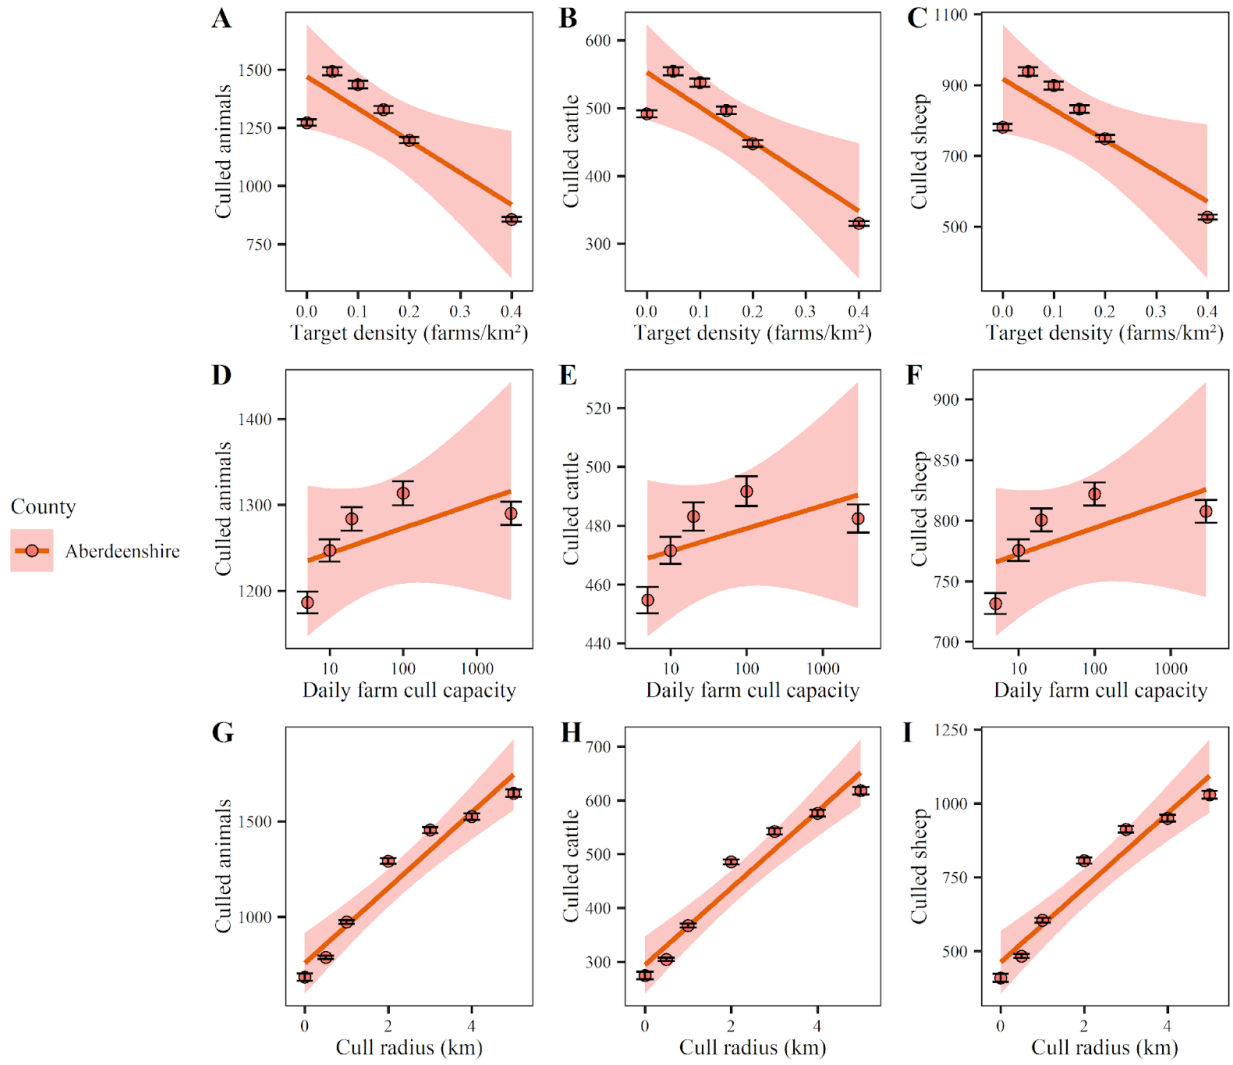

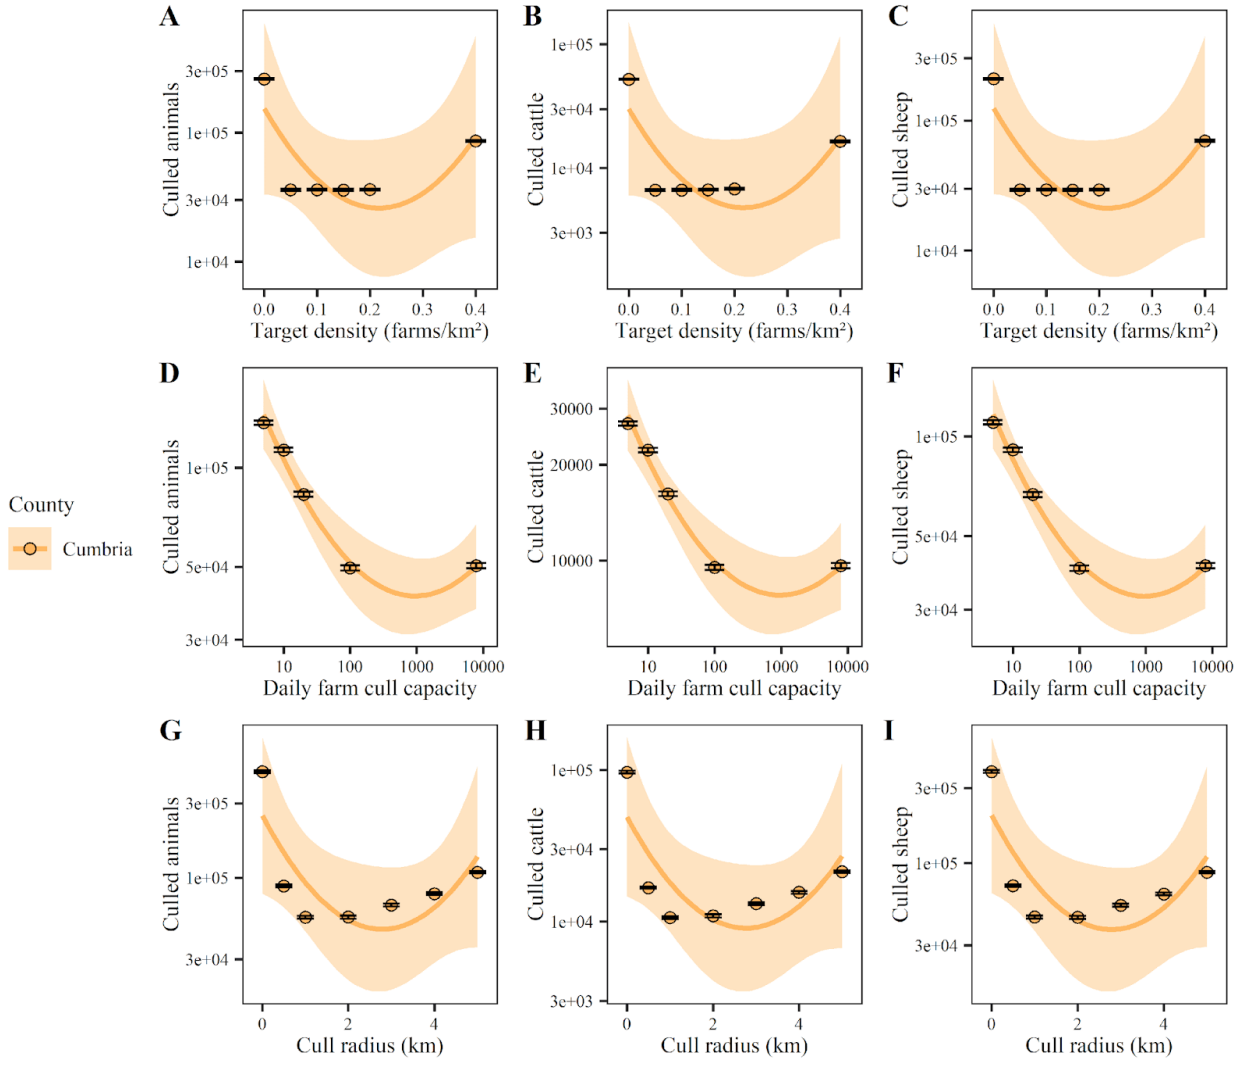

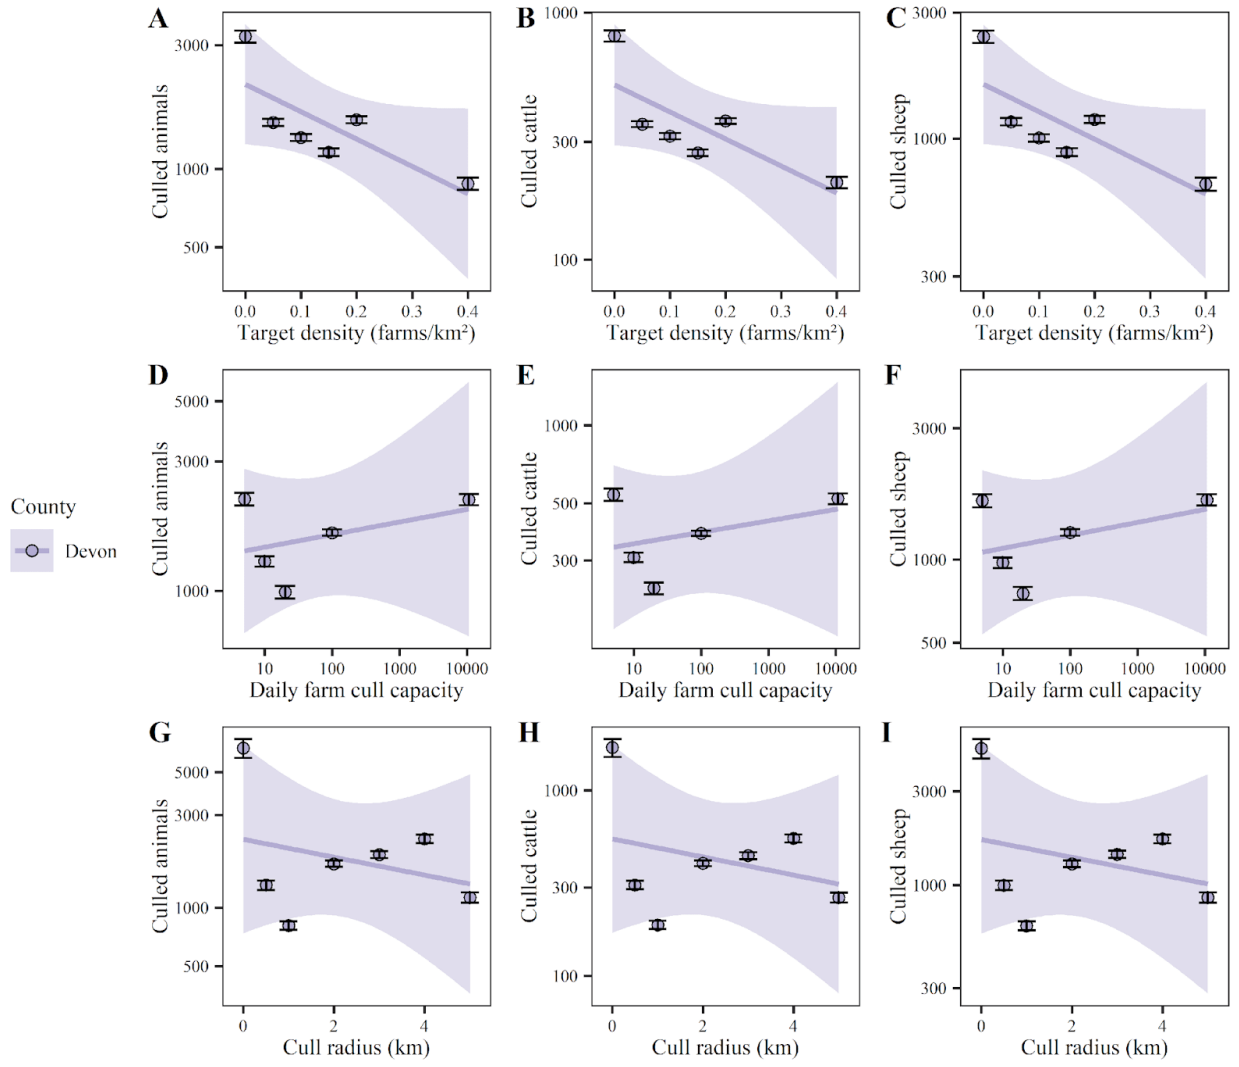

County  
North Yorkshire

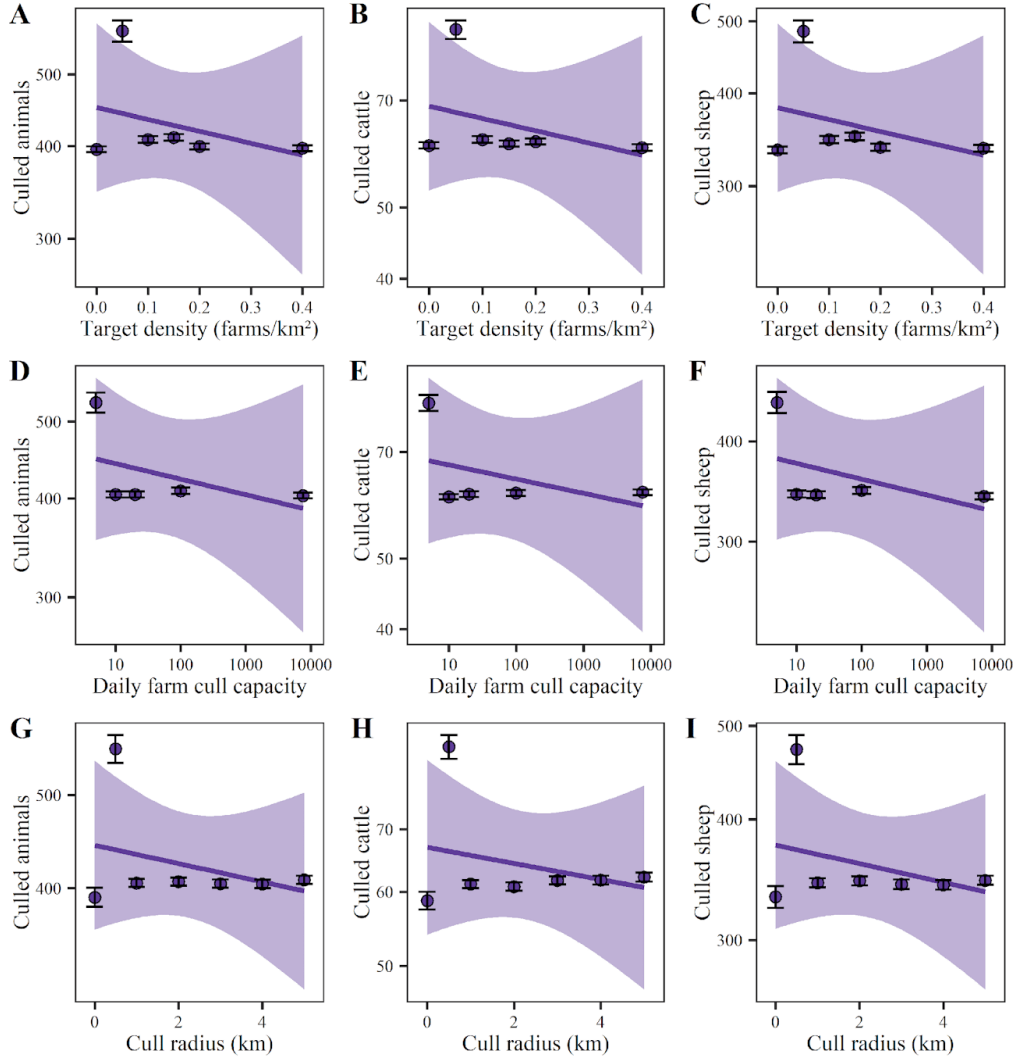

Supplement: FigureS1.pdf [file FigureS1.pdf]
