# Supplementary material for: Modeling target-density-based cull strategies to contain foot-and-mouth disease outbreaks
Source: PeerJ journal article supplement (doi:10.7717/peerj.16998), 2024-02-29

A)

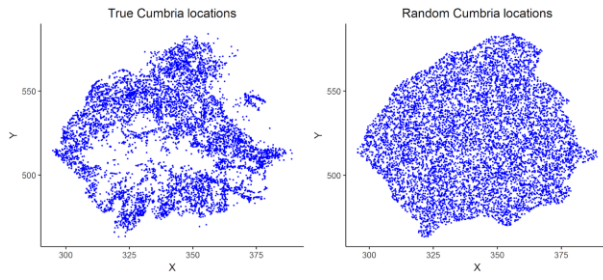

B)

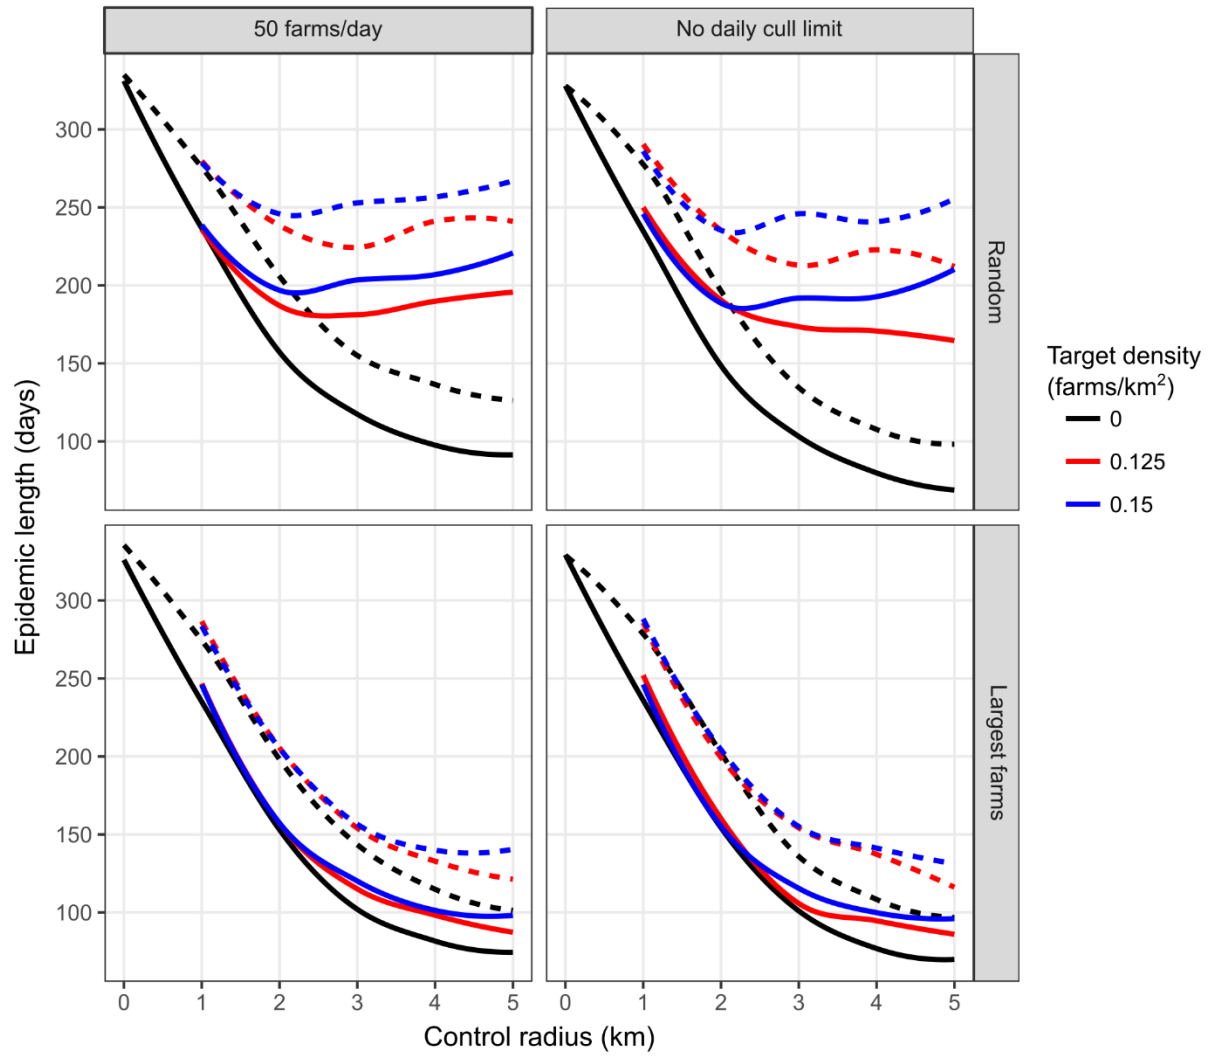

Supplement: FigureS5.pdf [file FigureS5.pdf]
