# Supplementary material for: Modeling target-density-based cull strategies to contain foot-and-mouth disease outbreaks
Source: PeerJ journal article supplement (doi:10.7717/peerj.16998), 2024-02-29

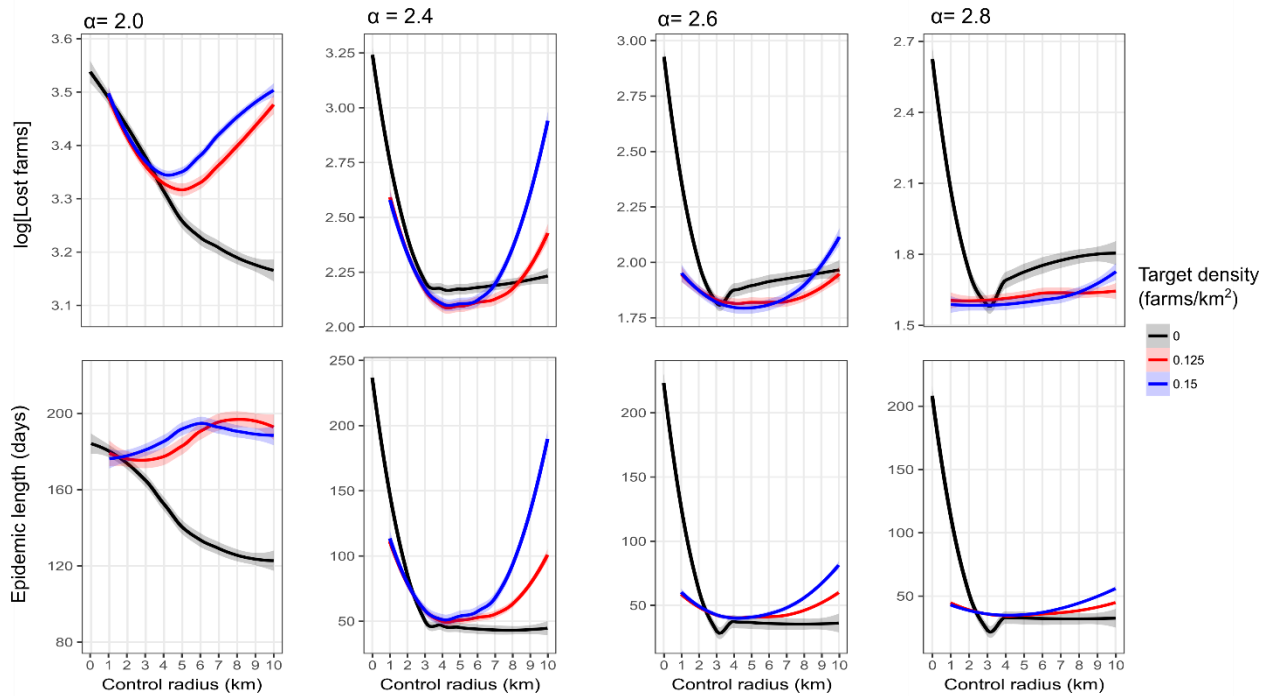

Supplement: FigureS7.pdf [file FigureS7.pdf]
