# Supplementary material for: Modeling target-density-based cull strategies to contain foot-and-mouth disease outbreaks
Source: PeerJ journal article supplement (doi:10.7717/peerj.16998), 2024-02-29
Supplement: TableS1.pdf [file TableS1.pdf]

Culled cattle by target density after culling

| County          | Density (farms/km <sup>2</sup> ) | N     | Mean culled cattle | sd     | se  | ci   |
|-----------------|----------------------------------|-------|--------------------|--------|-----|------|
| Aberdeenshire   | 0                                | 35000 | 491                | 942    | 5   | 10   |
| Aberdeenshire   | 0.05                             | 30000 | 554                | 1048   | 6   | 12   |
| Aberdeenshire   | 0.1                              | 30000 | 538                | 1020   | 6   | 12   |
| Aberdeenshire   | 0.15                             | 30000 | 497                | 932    | 5   | 11   |
| Aberdeenshire   | 0.2                              | 30000 | 448                | 837    | 5   | 9    |
| Aberdeenshire   | 0.4                              | 30000 | 330                | 623    | 4   | 7    |
| Cumbria         | 0                                | 35000 | 52219              | 109258 | 584 | 1145 |
| Cumbria         | 0.05                             | 30000 | 6643               | 20214  | 117 | 229  |
| Cumbria         | 0.1                              | 30000 | 6654               | 20426  | 118 | 231  |
| Cumbria         | 0.15                             | 30000 | 6683               | 20611  | 119 | 233  |
| Cumbria         | 0.2                              | 30000 | 6799               | 19959  | 115 | 226  |
| Cumbria         | 0.4                              | 30000 | 16473              | 48782  | 282 | 552  |
| Devon           | 0                                | 35000 | 804                | 7933   | 42  | 83   |
| Devon           | 0.05                             | 30000 | 354                | 1738   | 10  | 20   |
| Devon           | 0.1                              | 30000 | 316                | 1571   | 9   | 18   |
| Devon           | 0.15                             | 30000 | 271                | 1415   | 8   | 16   |
| Devon           | 0.2                              | 30000 | 364                | 1721   | 10  | 19   |
| Devon           | 0.4                              | 30000 | 206                | 1886   | 11  | 21   |
| North Yorkshire | 0                                | 35000 | 61                 | 111    | 1   | 1    |
| North Yorkshire | 0.05                             | 30000 | 87                 | 435    | 3   | 5    |
| North Yorkshire | 0.1                              | 30000 | 62                 | 113    | 1   | 1    |
| North Yorkshire | 0.15                             | 30000 | 61                 | 104    | 1   | 1    |
| North Yorkshire | 0.2                              | 30000 | 61                 | 104    | 1   | 1    |
| North Yorkshire | 0.4                              | 30000 | 60                 | 107    | 1   | 1    |

Culled cattle by daily farm cull capacity

| County          | Capacity (farms) | N     | Mean culled cattle | sd    | se  | ci  |
|-----------------|------------------|-------|--------------------|-------|-----|-----|
| Aberdeenshire   | 5                | 37000 | 455                | 860   | 4   | 9   |
| Aberdeenshire   | 10               | 37000 | 472                | 886   | 5   | 9   |
| Aberdeenshire   | 20               | 37000 | 483                | 932   | 5   | 9   |
| Aberdeenshire   | 100              | 37000 | 492                | 967   | 5   | 10  |
| Aberdeenshire   | 2925             | 37000 | 482                | 925   | 5   | 9   |
| Cumbria         | 5                | 37000 | 26928              | 75925 | 395 | 774 |
| Cumbria         | 10               | 37000 | 22214              | 67751 | 352 | 690 |
| Cumbria         | 20               | 37000 | 16185              | 55053 | 286 | 561 |
| Cumbria         | 100              | 37000 | 9500               | 34593 | 180 | 352 |
| Cumbria         | 7884             | 37000 | 9638               | 35457 | 184 | 361 |
| Devon           | 5                | 37000 | 539                | 5688  | 30  | 58  |
| Devon           | 10               | 37000 | 308                | 2532  | 13  | 26  |
| Devon           | 20               | 37000 | 234                | 2385  | 12  | 24  |
| Devon           | 100              | 37000 | 383                | 1767  | 9   | 18  |
| Devon           | 10662            | 37000 | 520                | 4844  | 25  | 49  |
| North Yorkshire | 5                | 37000 | 82                 | 393   | 2   | 4   |
| North Yorkshire | 10               | 37000 | 61                 | 103   | 1   | 1   |
| North Yorkshire | 20               | 37000 | 61                 | 111   | 1   | 1   |
| North Yorkshire | 100              | 37000 | 62                 | 112   | 1   | 1   |
| North Yorkshire | 7599             | 37000 | 62                 | 111   | 1   | 1   |

Culled cattle by cull radius

| County          | Cull radius (km) | N     | Mean culled cattle | sd     | se   | ci   |
|-----------------|------------------|-------|--------------------|--------|------|------|
| Aberdeenshire   | 0                | 5000  | 274                | 508    | 7    | 14   |
| Aberdeenshire   | 0.5              | 30000 | 304                | 546    | 3    | 6    |
| Aberdeenshire   | 1                | 30000 | 367                | 650    | 4    | 7    |
| Aberdeenshire   | 2                | 30000 | 486                | 861    | 5    | 10   |
| Aberdeenshire   | 3                | 30000 | 542                | 991    | 6    | 11   |
| Aberdeenshire   | 4                | 30000 | 576                | 1077   | 6    | 12   |
| Aberdeenshire   | 5                | 30000 | 618                | 1197   | 7    | 14   |
| Cumbria         | 0                | 5000  | 96388              | 138170 | 1954 | 3831 |
| Cumbria         | 0.5              | 30000 | 16717              | 49924  | 288  | 565  |
| Cumbria         | 1                | 30000 | 10596              | 40383  | 233  | 457  |
| Cumbria         | 2                | 30000 | 10888              | 43779  | 253  | 495  |
| Cumbria         | 3                | 30000 | 13110              | 49268  | 284  | 558  |
| Cumbria         | 4                | 30000 | 15555              | 53287  | 308  | 603  |
| Cumbria         | 5                | 30000 | 21244              | 64620  | 373  | 731  |
| Devon           | 0                | 5000  | 1701               | 13218  | 187  | 366  |
| Devon           | 0.5              | 30000 | 310                | 2846   | 16   | 32   |
| Devon           | 1                | 30000 | 189                | 1648   | 10   | 19   |
| Devon           | 2                | 30000 | 404                | 2482   | 14   | 28   |
| Devon           | 3                | 30000 | 446                | 3278   | 19   | 37   |
| Devon           | 4                | 30000 | 551                | 4772   | 28   | 54   |
| Devon           | 5                | 30000 | 274                | 508    | 7    | 14   |
| North Yorkshire | 0                | 5000  | 304                | 546    | 3    | 6    |
| North Yorkshire | 0.5              | 30000 | 367                | 650    | 4    | 7    |
| North Yorkshire | 1                | 30000 | 486                | 861    | 5    | 10   |
| North Yorkshire | 2                | 30000 | 542                | 991    | 6    | 11   |

|                 |   |       |       |        |      |      |
|-----------------|---|-------|-------|--------|------|------|
| North Yorkshire | 3 | 30000 | 576   | 1077   | 6    | 12   |
| North Yorkshire | 4 | 30000 | 618   | 1197   | 7    | 14   |
| North Yorkshire | 5 | 30000 | 96388 | 138170 | 1954 | 3831 |

Culled sheep by target density after culling

| County          | Density (farms/km <sup>2</sup> ) | N     | Mean culled sheep | sd     | se   | ci   |
|-----------------|----------------------------------|-------|-------------------|--------|------|------|
| Aberdeenshire   | 0                                | 35000 | 781               | 1773   | 9    | 19   |
| Aberdeenshire   | 0.05                             | 30000 | 938               | 2060   | 12   | 23   |
| Aberdeenshire   | 0.1                              | 30000 | 898               | 1951   | 11   | 22   |
| Aberdeenshire   | 0.15                             | 30000 | 832               | 1812   | 10   | 21   |
| Aberdeenshire   | 0.2                              | 30000 | 749               | 1643   | 9    | 19   |
| Aberdeenshire   | 0.4                              | 30000 | 526               | 1206   | 7    | 14   |
| Cumbria         | 0                                | 35000 | 208495            | 435041 | 2325 | 4558 |
| Cumbria         | 0.05                             | 30000 | 29312             | 91673  | 529  | 1037 |
| Cumbria         | 0.1                              | 30000 | 29382             | 92223  | 532  | 1044 |
| Cumbria         | 0.15                             | 30000 | 29197             | 92941  | 537  | 1052 |
| Cumbria         | 0.2                              | 30000 | 29370             | 89927  | 519  | 1018 |
| Cumbria         | 0.4                              | 30000 | 69723             | 208937 | 1206 | 2364 |
| Devon           | 0                                | 35000 | 2430              | 24290  | 130  | 254  |
| Devon           | 0.05                             | 30000 | 1157              | 6521   | 38   | 74   |
| Devon           | 0.1                              | 30000 | 1004              | 5718   | 33   | 65   |
| Devon           | 0.15                             | 30000 | 888               | 5263   | 30   | 60   |
| Devon           | 0.2                              | 30000 | 1181              | 6398   | 37   | 72   |
| Devon           | 0.4                              | 30000 | 671               | 6543   | 38   | 74   |
| North Yorkshire | 0                                | 35000 | 335               | 624    | 3    | 7    |
| North Yorkshire | 0.05                             | 30000 | 485               | 2860   | 17   | 32   |
| North Yorkshire | 0.1                              | 30000 | 781               | 1773   | 9    | 19   |
| North Yorkshire | 0.15                             | 30000 | 938               | 2060   | 12   | 23   |
| North Yorkshire | 0.2                              | 30000 | 898               | 1951   | 11   | 22   |
| North Yorkshire | 0.4                              | 30000 | 832               | 1812   | 10   | 21   |

Culled sheep by daily farm cull capacity

| County          | Capacity (farms) | N     | Mean culled sheep | sd     | se   | ci   |
|-----------------|------------------|-------|-------------------|--------|------|------|
| Aberdeenshire   | 5                | 37000 | 732               | 1663   | 9    | 17   |
| Aberdeenshire   | 10               | 37000 | 775               | 1722   | 9    | 18   |
| Aberdeenshire   | 20               | 37000 | 801               | 1798   | 9    | 18   |
| Aberdeenshire   | 100              | 37000 | 822               | 1844   | 10   | 19   |
| Aberdeenshire   | 2925             | 37000 | 808               | 1803   | 9    | 18   |
| Cumbria         | 5                | 37000 | 110236            | 307187 | 1597 | 3130 |
| Cumbria         | 10               | 37000 | 91029             | 273710 | 1423 | 2789 |
| Cumbria         | 20               | 37000 | 66802             | 224156 | 1165 | 2284 |
| Cumbria         | 100              | 37000 | 40025             | 142728 | 742  | 1454 |
| Cumbria         | 7884             | 37000 | 40740             | 146580 | 762  | 1494 |
| Devon           | 5                | 37000 | 1638              | 17429  | 91   | 178  |
| Devon           | 10               | 37000 | 976               | 8377   | 44   | 85   |
| Devon           | 20               | 37000 | 755               | 7849   | 41   | 80   |
| Devon           | 100              | 37000 | 1256              | 6631   | 34   | 68   |
| Devon           | 10662            | 37000 | 1648              | 15200  | 79   | 155  |
| North Yorkshire | 5                | 37000 | 447               | 2591   | 13   | 26   |
| North Yorkshire | 10               | 37000 | 344               | 656    | 3    | 7    |
| North Yorkshire | 20               | 37000 | 343               | 634    | 3    | 6    |
| North Yorkshire | 100              | 37000 | 347               | 667    | 3    | 7    |
| North Yorkshire | 7599             | 37000 | 342               | 627    | 3    | 6    |

Culled sheep by cull radius

| County          | Cull radius (km) | N     | Mean culled sheep | sd     | se   | ci    |
|-----------------|------------------|-------|-------------------|--------|------|-------|
| Aberdeenshire   | 0                | 5000  | 410               | 954    | 13   | 26    |
| Aberdeenshire   | 0.5              | 30000 | 483               | 1119   | 6    | 13    |
| Aberdeenshire   | 1                | 30000 | 605               | 1347   | 8    | 15    |
| Aberdeenshire   | 2                | 30000 | 807               | 1711   | 10   | 19    |
| Aberdeenshire   | 3                | 30000 | 913               | 1936   | 11   | 22    |
| Aberdeenshire   | 4                | 30000 | 950               | 2020   | 12   | 23    |
| Aberdeenshire   | 5                | 30000 | 1030              | 2244   | 13   | 25    |
| Cumbria         | 0                | 5000  | 381976            | 548483 | 7757 | 15207 |
| Cumbria         | 0.5              | 30000 | 71790             | 212525 | 1227 | 2405  |
| Cumbria         | 1                | 30000 | 45329             | 167500 | 967  | 1895  |
| Cumbria         | 2                | 30000 | 45052             | 176291 | 1018 | 1995  |
| Cumbria         | 3                | 30000 | 53772             | 197379 | 1140 | 2234  |
| Cumbria         | 4                | 30000 | 63528             | 214994 | 1241 | 2433  |
| Cumbria         | 5                | 30000 | 87092             | 263490 | 1521 | 2982  |
| Devon           | 0                | 5000  | 4957              | 39435  | 558  | 1093  |
| Devon           | 0.5              | 30000 | 998               | 9751   | 56   | 110   |
| Devon           | 1                | 30000 | 621               | 5588   | 32   | 63    |
| Devon           | 2                | 30000 | 1281              | 8419   | 49   | 95    |
| Devon           | 3                | 30000 | 1432              | 10640  | 61   | 120   |
| Devon           | 4                | 30000 | 1714              | 14842  | 86   | 168   |
| Devon           | 5                | 30000 | 864               | 9175   | 53   | 104   |
| North Yorkshire | 0                | 5000  | 333               | 608    | 9    | 17    |
| North Yorkshire | 0.5              | 30000 | 473               | 2850   | 16   | 32    |
| North Yorkshire | 1                | 30000 | 344               | 640    | 4    | 7     |
| North Yorkshire | 2                | 30000 | 345               | 641    | 4    | 7     |

|                 |   |       |     |     |   |   |
|-----------------|---|-------|-----|-----|---|---|
| North Yorkshire | 3 | 30000 | 343 | 666 | 4 | 8 |
| North Yorkshire | 4 | 30000 | 342 | 663 | 4 | 7 |
| North Yorkshire | 5 | 30000 | 346 | 670 | 4 | 8 |



Culled animals (culled cattle + culled sheep) by target density after culling

| County          | Density (farms/km <sup>2</sup> ) | N     | Mean culled animals | sd     | se   | ci   |
|-----------------|----------------------------------|-------|---------------------|--------|------|------|
| Aberdeenshire   | 0                                | 35000 | 1273                | 2601   | 14   | 27   |
| Aberdeenshire   | 0.05                             | 30000 | 1493                | 2985   | 17   | 34   |
| Aberdeenshire   | 0.1                              | 30000 | 1436                | 2858   | 17   | 32   |
| Aberdeenshire   | 0.15                             | 30000 | 1329                | 2627   | 15   | 30   |
| Aberdeenshire   | 0.2                              | 30000 | 1197                | 2372   | 14   | 27   |
| Aberdeenshire   | 0.4                              | 30000 | 856                 | 1725   | 10   | 20   |
| Cumbria         | 0                                | 35000 | 260714              | 544173 | 2909 | 5701 |
| Cumbria         | 0.05                             | 30000 | 35955               | 111353 | 643  | 1260 |
| Cumbria         | 0.1                              | 30000 | 36036               | 112107 | 647  | 1269 |
| Cumbria         | 0.15                             | 30000 | 35880               | 113036 | 653  | 1279 |
| Cumbria         | 0.2                              | 30000 | 36169               | 109293 | 631  | 1237 |
| Cumbria         | 0.4                              | 30000 | 86195               | 257270 | 1485 | 2911 |
| Devon           | 0                                | 35000 | 3235                | 32163  | 172  | 337  |
| Devon           | 0.05                             | 30000 | 1511                | 8135   | 47   | 92   |
| Devon           | 0.1                              | 30000 | 1320                | 7189   | 42   | 81   |
| Devon           | 0.15                             | 30000 | 1158                | 6584   | 38   | 75   |
| Devon           | 0.2                              | 30000 | 1545                | 8008   | 46   | 91   |
| Devon           | 0.4                              | 30000 | 877                 | 8384   | 48   | 95   |
| North Yorkshire | 0                                | 35000 | 396                 | 661    | 4    | 7    |
| North Yorkshire | 0.05                             | 30000 | 572                 | 3260   | 19   | 37   |
| North Yorkshire | 0.1                              | 30000 | 408                 | 701    | 4    | 8    |
| North Yorkshire | 0.15                             | 30000 | 411                 | 714    | 4    | 8    |
| North Yorkshire | 0.2                              | 30000 | 400                 | 677    | 4    | 8    |
| North Yorkshire | 0.4                              | 30000 | 398                 | 653    | 4    | 7    |

Culled animals (culled cattle + culled sheep) by daily farm cull capacity

| County          | Capacity (farms) | N     | Mean culled animals | sd     | se   | ci   |
|-----------------|------------------|-------|---------------------|--------|------|------|
| Aberdeenshire   | 5                | 37000 | 1186                | 2407   | 13   | 25   |
| Aberdeenshire   | 10               | 37000 | 1247                | 2495   | 13   | 25   |
| Aberdeenshire   | 20               | 37000 | 1284                | 2617   | 14   | 27   |
| Aberdeenshire   | 100              | 37000 | 1313                | 2705   | 14   | 28   |
| Aberdeenshire   | 2925             | 37000 | 1290                | 2613   | 14   | 27   |
| Cumbria         | 5                | 37000 | 137165              | 382831 | 1990 | 3901 |
| Cumbria         | 10               | 37000 | 113243              | 341197 | 1774 | 3477 |
| Cumbria         | 20               | 37000 | 82987               | 278924 | 1450 | 2842 |
| Cumbria         | 100              | 37000 | 49525               | 176939 | 920  | 1803 |
| Cumbria         | 7884             | 37000 | 50377               | 181664 | 944  | 1851 |
| Devon           | 5                | 37000 | 2177                | 23062  | 120  | 235  |
| Devon           | 10               | 37000 | 1284                | 10837  | 56   | 110  |
| Devon           | 20               | 37000 | 989                 | 10175  | 53   | 104  |
| Devon           | 100              | 37000 | 1639                | 8283   | 43   | 84   |
| Devon           | 10662            | 37000 | 2169                | 19971  | 104  | 204  |
| North Yorkshire | 5                | 37000 | 529                 | 2950   | 15   | 30   |
| North Yorkshire | 10               | 37000 | 404                 | 690    | 4    | 7    |
| North Yorkshire | 20               | 37000 | 404                 | 673    | 3    | 7    |
| North Yorkshire | 100              | 37000 | 409                 | 704    | 4    | 7    |
| North Yorkshire | 7599             | 37000 | 403                 | 662    | 3    | 7    |

Culled animals (culled cattle + culled sheep) by cull radius

| County          | Cull radius (km) | N     | Mean culled animals | sd     | se   | ci    |
|-----------------|------------------|-------|---------------------|--------|------|-------|
| Aberdeenshire   | 0                | 5000  | 684                 | 1374   | 19   | 38    |
| Aberdeenshire   | 0.5              | 30000 | 788                 | 1546   | 9    | 17    |
| Aberdeenshire   | 1                | 30000 | 972                 | 1870   | 11   | 21    |
| Aberdeenshire   | 2                | 30000 | 1292                | 2446   | 14   | 28    |
| Aberdeenshire   | 3                | 30000 | 1455                | 2804   | 16   | 32    |
| Aberdeenshire   | 4                | 30000 | 1526                | 2988   | 17   | 34    |
| Aberdeenshire   | 5                | 30000 | 1648                | 3336   | 19   | 38    |
| Cumbria         | 0                | 5000  | 478364              | 686551 | 9709 | 19034 |
| Cumbria         | 0.5              | 30000 | 88507               | 262005 | 1513 | 2965  |
| Cumbria         | 1                | 30000 | 55925               | 207500 | 1198 | 2348  |
| Cumbria         | 2                | 30000 | 55940               | 219808 | 1269 | 2487  |
| Cumbria         | 3                | 30000 | 66882               | 246410 | 1423 | 2788  |
| Cumbria         | 4                | 30000 | 79083               | 267983 | 1547 | 3033  |
| Cumbria         | 5                | 30000 | 108336              | 327848 | 1893 | 3710  |
| Devon           | 0                | 5000  | 6658                | 52599  | 744  | 1458  |
| Devon           | 0.5              | 30000 | 1307                | 12541  | 72   | 142   |
| Devon           | 1                | 30000 | 809                 | 7189   | 42   | 81    |
| Devon           | 2                | 30000 | 1686                | 10798  | 62   | 122   |
| Devon           | 3                | 30000 | 1878                | 13827  | 80   | 156   |
| Devon           | 4                | 30000 | 2266                | 19535  | 113  | 221   |
| Devon           | 5                | 30000 | 1129                | 11886  | 69   | 135   |
| North Yorkshire | 0                | 5000  | 391                 | 634    | 9    | 18    |
| North Yorkshire | 0.5              | 30000 | 558                 | 3249   | 19   | 37    |
| North Yorkshire | 1                | 30000 | 405                 | 671    | 4    | 8     |
| North Yorkshire | 2                | 30000 | 406                 | 675    | 4    | 8     |
| North Yorkshire | 3                | 30000 | 404                 | 703    | 4    | 8     |

|                 |   |       |     |     |   |   |
|-----------------|---|-------|-----|-----|---|---|
| North Yorkshire | 4 | 30000 | 404 | 703 | 4 | 8 |
| North Yorkshire | 5 | 30000 | 408 | 714 | 4 | 8 |

Culled farms by target density after culling

| County          | Density (farms/km <sup>2</sup> ) | N     | Mean culled farms | sd  | se | ci |
|-----------------|----------------------------------|-------|-------------------|-----|----|----|
| Aberdeenshire   | 0                                | 35000 | 5                 | 9   | 0  | 0  |
| Aberdeenshire   | 0.05                             | 30000 | 5                 | 10  | 0  | 0  |
| Aberdeenshire   | 0.1                              | 30000 | 5                 | 9   | 0  | 0  |
| Aberdeenshire   | 0.15                             | 30000 | 4                 | 8   | 0  | 0  |
| Aberdeenshire   | 0.2                              | 30000 | 4                 | 6   | 0  | 0  |
| Aberdeenshire   | 0.4                              | 30000 | 3                 | 4   | 0  | 0  |
| Cumbria         | 0                                | 35000 | 416               | 847 | 5  | 9  |
| Cumbria         | 0.05                             | 30000 | 75                | 214 | 1  | 2  |
| Cumbria         | 0.1                              | 30000 | 72                | 212 | 1  | 2  |
| Cumbria         | 0.15                             | 30000 | 70                | 212 | 1  | 2  |
| Cumbria         | 0.2                              | 30000 | 68                | 204 | 1  | 2  |
| Cumbria         | 0.4                              | 30000 | 132               | 376 | 2  | 4  |
| Devon           | 0                                | 35000 | 9                 | 82  | 0  | 1  |
| Devon           | 0.05                             | 30000 | 5                 | 24  | 0  | 0  |
| Devon           | 0.1                              | 30000 | 4                 | 20  | 0  | 0  |
| Devon           | 0.15                             | 30000 | 4                 | 18  | 0  | 0  |
| Devon           | 0.2                              | 30000 | 4                 | 20  | 0  | 0  |
| Devon           | 0.4                              | 30000 | 3                 | 25  | 0  | 0  |
| North Yorkshire | 0                                | 35000 | 1                 | 0   | 0  | 0  |
| North Yorkshire | 0.05                             | 30000 | 1                 | 6   | 0  | 0  |
| North Yorkshire | 0.1                              | 30000 | 1                 | 1   | 0  | 0  |
| North Yorkshire | 0.15                             | 30000 | 1                 | 1   | 0  | 0  |
| North Yorkshire | 0.2                              | 30000 | 1                 | 1   | 0  | 0  |
| North Yorkshire | 0.4                              | 30000 | 1                 | 0   | 0  | 0  |

Culled farms by daily farm cull capacity

| County          | Capacity (farms) | N     | Mean culled farms | sd  | se | ci |
|-----------------|------------------|-------|-------------------|-----|----|----|
| Aberdeenshire   | 5                | 37000 | 4                 | 7   | 0  | 0  |
| Aberdeenshire   | 10               | 37000 | 4                 | 8   | 0  | 0  |
| Aberdeenshire   | 20               | 37000 | 4                 | 8   | 0  | 0  |
| Aberdeenshire   | 100              | 37000 | 5                 | 9   | 0  | 0  |
| Aberdeenshire   | 2925             | 37000 | 4                 | 8   | 0  | 0  |
| Cumbria         | 5                | 37000 | 224               | 603 | 3  | 6  |
| Cumbria         | 10               | 37000 | 187               | 537 | 3  | 5  |
| Cumbria         | 20               | 37000 | 141               | 444 | 2  | 5  |
| Cumbria         | 100              | 37000 | 89                | 281 | 1  | 3  |
| Cumbria         | 7884             | 37000 | 90                | 287 | 1  | 3  |
| Devon           | 5                | 37000 | 6                 | 51  | 0  | 1  |
| Devon           | 10               | 37000 | 4                 | 29  | 0  | 0  |
| Devon           | 20               | 37000 | 3                 | 35  | 0  | 0  |
| Devon           | 100              | 37000 | 5                 | 23  | 0  | 0  |
| Devon           | 10662            | 37000 | 6                 | 54  | 0  | 1  |
| North Yorkshire | 5                | 37000 | 1                 | 5   | 0  | 0  |
| North Yorkshire | 10               | 37000 | 1                 | 0   | 0  | 0  |
| North Yorkshire | 20               | 37000 | 1                 | 0   | 0  | 0  |
| North Yorkshire | 100              | 37000 | 1                 | 1   | 0  | 0  |
| North Yorkshire | 7599             | 37000 | 1                 | 0   | 0  | 0  |

Culled farms by cull radius

| County          | Cull radius (km) | N     | Mean culled farms | sd   | se | ci |
|-----------------|------------------|-------|-------------------|------|----|----|
| Aberdeenshire   | 0                | 5000  | 2                 | 3    | 0  | 0  |
| Aberdeenshire   | 0.5              | 30000 | 3                 | 4    | 0  | 0  |
| Aberdeenshire   | 1                | 30000 | 4                 | 6    | 0  | 0  |
| Aberdeenshire   | 2                | 30000 | 5                 | 8    | 0  | 0  |
| Aberdeenshire   | 3                | 30000 | 5                 | 9    | 0  | 0  |
| Aberdeenshire   | 4                | 30000 | 5                 | 9    | 0  | 0  |
| Aberdeenshire   | 5                | 30000 | 5                 | 10   | 0  | 0  |
| Cumbria         | 0                | 5000  | 738               | 1058 | 15 | 29 |
| Cumbria         | 0.5              | 30000 | 167               | 464  | 3  | 5  |
| Cumbria         | 1                | 30000 | 105               | 347  | 2  | 4  |
| Cumbria         | 2                | 30000 | 99                | 350  | 2  | 4  |
| Cumbria         | 3                | 30000 | 113               | 386  | 2  | 4  |
| Cumbria         | 4                | 30000 | 127               | 411  | 2  | 5  |
| Cumbria         | 5                | 30000 | 168               | 487  | 3  | 6  |
| Devon           | 0                | 5000  | 15                | 115  | 2  | 3  |
| Devon           | 0.5              | 30000 | 4                 | 43   | 0  | 0  |
| Devon           | 1                | 30000 | 3                 | 23   | 0  | 0  |
| Devon           | 2                | 30000 | 5                 | 29   | 0  | 0  |
| Devon           | 3                | 30000 | 5                 | 32   | 0  | 0  |
| Devon           | 4                | 30000 | 6                 | 45   | 0  | 1  |
| Devon           | 5                | 30000 | 3                 | 41   | 0  | 0  |
| North Yorkshire | 0                | 5000  | 1                 | 0    | 0  | 0  |
| North Yorkshire | 0.5              | 30000 | 1                 | 6    | 0  | 0  |
| North Yorkshire | 1                | 30000 | 1                 | 0    | 0  | 0  |
| North Yorkshire | 2                | 30000 | 1                 | 0    | 0  | 0  |
| North Yorkshire | 3                | 30000 | 1                 | 1    | 0  | 0  |

|                 |   |       |   |   |   |   |
|-----------------|---|-------|---|---|---|---|
| North Yorkshire | 4 | 30000 | 1 | 1 | 0 | 0 |
| North Yorkshire | 5 | 30000 | 1 | 1 | 0 | 0 |



Epidemic length (days) by target density after culling

| County          | Density (farms/km <sup>2</sup> ) | N     | Mean epidemic length (days) | sd  | se | ci |
|-----------------|----------------------------------|-------|-----------------------------|-----|----|----|
| Aberdeenshire   | 0                                | 35000 | 19                          | 12  | 0  | 0  |
| Aberdeenshire   | 0.05                             | 30000 | 18                          | 10  | 0  | 0  |
| Aberdeenshire   | 0.1                              | 30000 | 19                          | 10  | 0  | 0  |
| Aberdeenshire   | 0.15                             | 30000 | 19                          | 11  | 0  | 0  |
| Aberdeenshire   | 0.2                              | 30000 | 19                          | 11  | 0  | 0  |
| Aberdeenshire   | 0.4                              | 30000 | 20                          | 13  | 0  | 0  |
| Cumbria         | 0                                | 35000 | 110                         | 177 | 1  | 2  |
| Cumbria         | 0.05                             | 30000 | 40                          | 56  | 0  | 1  |
| Cumbria         | 0.1                              | 30000 | 41                          | 56  | 0  | 1  |
| Cumbria         | 0.15                             | 30000 | 41                          | 56  | 0  | 1  |
| Cumbria         | 0.2                              | 30000 | 42                          | 57  | 0  | 1  |
| Cumbria         | 0.4                              | 30000 | 69                          | 113 | 1  | 1  |
| Devon           | 0                                | 35000 | 18                          | 39  | 0  | 0  |
| Devon           | 0.05                             | 30000 | 15                          | 10  | 0  | 0  |
| Devon           | 0.1                              | 30000 | 15                          | 10  | 0  | 0  |
| Devon           | 0.15                             | 30000 | 14                          | 8   | 0  | 0  |
| Devon           | 0.2                              | 30000 | 15                          | 10  | 0  | 0  |
| Devon           | 0.4                              | 30000 | 14                          | 10  | 0  | 0  |
| North Yorkshire | 0                                | 35000 | 13                          | 0   | 0  | 0  |
| North Yorkshire | 0.05                             | 30000 | 14                          | 6   | 0  | 0  |
| North Yorkshire | 0.1                              | 30000 | 13                          | 0   | 0  | 0  |
| North Yorkshire | 0.15                             | 30000 | 13                          | 1   | 0  | 0  |
| North Yorkshire | 0.2                              | 30000 | 13                          | 0   | 0  | 0  |
| North Yorkshire | 0.4                              | 30000 | 13                          | 0   | 0  | 0  |

Epidemic length (days) by daily farm cull capacity

| County          | Capacity (farms) | N     | Mean epidemic length (days) | sd  | se | ci |
|-----------------|------------------|-------|-----------------------------|-----|----|----|
| Aberdeenshire   | 5                | 37000 | 19                          | 12  | 0  | 0  |
| Aberdeenshire   | 10               | 37000 | 19                          | 11  | 0  | 0  |
| Aberdeenshire   | 20               | 37000 | 19                          | 11  | 0  | 0  |
| Aberdeenshire   | 100              | 37000 | 19                          | 11  | 0  | 0  |
| Aberdeenshire   | 2925             | 37000 | 19                          | 11  | 0  | 0  |
| Cumbria         | 5                | 37000 | 75                          | 132 | 1  | 1  |
| Cumbria         | 10               | 37000 | 67                          | 119 | 1  | 1  |
| Cumbria         | 20               | 37000 | 57                          | 99  | 1  | 1  |
| Cumbria         | 100              | 37000 | 47                          | 76  | 0  | 1  |
| Cumbria         | 7884             | 37000 | 47                          | 77  | 0  | 1  |
| Devon           | 5                | 37000 | 16                          | 30  | 0  | 0  |
| Devon           | 10               | 37000 | 15                          | 15  | 0  | 0  |
| Devon           | 20               | 37000 | 14                          | 8   | 0  | 0  |
| Devon           | 100              | 37000 | 16                          | 12  | 0  | 0  |
| Devon           | 10662            | 37000 | 16                          | 22  | 0  | 0  |
| North Yorkshire | 5                | 37000 | 13                          | 5   | 0  | 0  |
| North Yorkshire | 10               | 37000 | 13                          | 0   | 0  | 0  |
| North Yorkshire | 20               | 37000 | 13                          | 0   | 0  | 0  |
| North Yorkshire | 100              | 37000 | 13                          | 0   | 0  | 0  |
| North Yorkshire | 7599             | 37000 | 13                          | 0   | 0  | 0  |

Epidemic length (days) by cull radius

| County          | Cull radius (km) | N     | Mean epidemic length (days) | sd  | se | ci |
|-----------------|------------------|-------|-----------------------------|-----|----|----|
| Aberdeenshire   | 0                | 5000  | 21                          | 16  | 0  | 0  |
| Aberdeenshire   | 0.5              | 30000 | 19                          | 12  | 0  | 0  |
| Aberdeenshire   | 1                | 30000 | 19                          | 11  | 0  | 0  |
| Aberdeenshire   | 2                | 30000 | 19                          | 11  | 0  | 0  |
| Aberdeenshire   | 3                | 30000 | 19                          | 11  | 0  | 0  |
| Aberdeenshire   | 4                | 30000 | 19                          | 11  | 0  | 0  |
| Aberdeenshire   | 5                | 30000 | 19                          | 12  | 0  | 0  |
| Cumbria         | 0                | 5000  | 183                         | 232 | 3  | 6  |
| Cumbria         | 0.5              | 30000 | 72                          | 112 | 1  | 1  |
| Cumbria         | 1                | 30000 | 52                          | 78  | 0  | 1  |
| Cumbria         | 2                | 30000 | 45                          | 74  | 0  | 1  |
| Cumbria         | 3                | 30000 | 47                          | 83  | 0  | 1  |
| Cumbria         | 4                | 30000 | 52                          | 93  | 1  | 1  |
| Cumbria         | 5                | 30000 | 62                          | 120 | 1  | 1  |
| Devon           | 0                | 5000  | 24                          | 66  | 1  | 2  |
| Devon           | 0.5              | 30000 | 16                          | 17  | 0  | 0  |
| Devon           | 1                | 30000 | 14                          | 9   | 0  | 0  |
| Devon           | 2                | 30000 | 16                          | 14  | 0  | 0  |
| Devon           | 3                | 30000 | 15                          | 17  | 0  | 0  |
| Devon           | 4                | 30000 | 16                          | 25  | 0  | 0  |
| Devon           | 5                | 30000 | 14                          | 6   | 0  | 0  |
| North Yorkshire | 0                | 5000  | 13                          | 0   | 0  | 0  |
| North Yorkshire | 0.5              | 30000 | 14                          | 6   | 0  | 0  |
| North Yorkshire | 1                | 30000 | 13                          | 0   | 0  | 0  |
| North Yorkshire | 2                | 30000 | 13                          | 0   | 0  | 0  |
| North Yorkshire | 3                | 30000 | 13                          | 1   | 0  | 0  |

|                 |   |       |    |   |   |   |
|-----------------|---|-------|----|---|---|---|
| North Yorkshire | 4 | 30000 | 13 | 1 | 0 | 0 |
| North Yorkshire | 5 | 30000 | 13 | 0 | 0 | 0 |
