# Supplementary material for: Modeling target-density-based cull strategies to contain foot-and-mouth disease outbreaks
Source: PeerJ journal article supplement (doi:10.7717/peerj.16998), 2024-02-29
Supplement: TableS2.pdf [file TableS2.pdf]

### Target farm density and culled cattle

| County          | Coefficient    | Estimate | Standard error | t-value | Pr(> t )     |
|-----------------|----------------|----------|----------------|---------|--------------|
| Aberdeenshire   | Intercept      | 476.26   | 14.07          | 33.855  | 5.67e-05 *** |
| Aberdeenshire   | Linear term    | -161.87  | 34.46          | -4.698  | 0.0182 *     |
| Aberdeenshire   | Quadratic term | -54.76   | 34.46          | -1.589  | 0.2102       |
| Cumbria         | Intercept      | 15912    | 5554           | 2.865   | 0.0643       |
| Cumbria         | Linear term    | -13825   | 13605          | -1.016  | 0.3844       |
| Cumbria         | Quadratic term | 30198    | 13605          | 2.220   | 0.1131       |
| Devon           | Intercept      | 385.67   | 62.66          | 6.155   | 0.00863 **   |
| Devon           | Linear term    | -323.33  | 153.49         | -2.107  | 0.12578      |
| Devon           | Quadratic term | 228.37   | 153.49         | 1.488   | 0.23350      |
| North Yorkshire | Intercept      | 65.516   | 5.250          | 12.479  | 0.00111 **   |
| North Yorkshire | Linear term    | -8.830   | 12.860         | -0.687  | 0.54163      |
| North Yorkshire | Quadratic term | 2.146    | 12.860         | 0.167   | 0.87810      |

### Target farm density and culled sheep

| County          | Coefficient    | Estimate | Standard error | t-value | Pr(> t )     |
|-----------------|----------------|----------|----------------|---------|--------------|
| Aberdeenshire   | Intercept      | 787.59   | 29.36          | 26.826  | 0.000114 *** |
| Aberdeenshire   | Linear term    | -274.63  | 71.92          | -3.819  | 0.031598 *   |
| Aberdeenshire   | Quadratic term | -125.56  | 71.92          | -1.746  | 0.179156     |
| Cumbria         | Intercept      | 65913    | 21748          | 3.031   | 0.0563       |
| Cumbria         | Linear term    | -53048   | 53272          | -0.996  | 0.3927       |
| Cumbria         | Quadratic term | 119892   | 53272          | 2.251   | 0.1099       |
| Devon           | Intercept      | 1221.9   | 181.7          | 6.724   | 0.00672 **   |
| Devon           | Linear term    | -960.2   | 445.1          | -2.157  | 0.11991      |
| Devon           | Quadratic term | 642.0    | 445.1          | 1.442   | 0.24491      |
| North Yorkshire | Intercept      | 365.327  | 28.884         | 12.648  | 0.00107 **   |
| North Yorkshire | Linear term    | -47.139  | 70.750         | -0.666  | 0.55290      |
| North Yorkshire | Quadratic term | 8.161    | 70.750         | 0.115   | 0.91545      |

Target farm density and culled animals

| County          | Coefficient    | Estimate | Standard error | t-value | Pr(> t )     |
|-----------------|----------------|----------|----------------|---------|--------------|
| Aberdeenshire   | Intercept      | 1263.85  | 43.36          | 29.148  | 8.87e-05 *** |
| Aberdeenshire   | Linear term    | -436.50  | 106.21         | -4.110  | 0.0261 *     |
| Aberdeenshire   | Quadratic term | -180.32  | 106.21         | -1.698  | 0.1881       |
| Cumbria         | Intercept      | 81825    | 27302          | 2.997   | 0.0578       |
| Cumbria         | Linear term    | -66873   | 66877          | -1.000  | 0.3910       |
| Cumbria         | Quadratic term | 150090   | 66877          | 2.244   | 0.1105       |
| Devon           | Intercept      | 1607.6   | 244.3          | 6.580   | 0.00714 **   |
| Devon           | Linear term    | -1283.5  | 598.5          | -2.145  | 0.12132      |
| Devon           | Quadratic term | 870.4    | 598.5          | 1.454   | 0.24184      |
| North Yorkshire | Intercept      | 430.84   | 34.12          | 12.628  | 0.00107 **   |
| North Yorkshire | Linear term    | -55.97   | 83.57          | -0.670  | 0.55098      |
| North Yorkshire | Quadratic term | 10.31    | 83.57          | 0.123   | 0.90964      |

Target farm density and culled farms

| County          | Coefficient    | Estimate | Standard error | t-value | Pr(> t )     |
|-----------------|----------------|----------|----------------|---------|--------------|
| Aberdeenshire   | Intercept      | 4.3500   | 0.1693         | 25.688  | 0.000129 *** |
| Aberdeenshire   | Linear term    | -2.0433  | 0.4148         | -4.926  | 0.016035 *   |
| Aberdeenshire   | Quadratic term | -0.1091  | 0.4148         | -0.263  | 0.809553     |
| Cumbria         | Intercept      | 138.78   | 41.19          | 3.369   | 0.0434 *     |
| Cumbria         | Linear term    | -117.60  | 100.89         | -1.66   | 0.3280       |
| Cumbria         | Quadratic term | 225.63   | 100.89         | 2.236   | 0.1113       |
| Devon           | Intercept      | 4.8043   | 0.5038         | 9.536   | 0.00245 **   |
| Devon           | Linear term    | -3.7239  | 1.2341         | -3.017  | 0.05688      |
| Devon           | Quadratic term | 2.1173   | 1.2341         | 1.716   | 0.18474      |
| North Yorkshire | Intercept      | 1.07564  | 0.07095        | 15.160  | 0.000623 *** |
| North Yorkshire | Linear term    | -0.11922 | 0.17380        | -0.686  | 0.541992     |
| North Yorkshire | Quadratic term | 0.03439  | 0.17380        | 0.198   | 0.855792     |

### Target farm density and epidemic length

| County          | Coefficient    | Estimate | Standard error | t-value | Pr(> t )     |
|-----------------|----------------|----------|----------------|---------|--------------|
| Aberdeenshire   | Intercept      | 19.1389  | 0.1558         | 122.876 | 1.19e-06 *** |
| Aberdeenshire   | Linear term    | 0.8170   | 0.3815         | 2.141   | 0.122        |
| Aberdeenshire   | Quadratic term | 0.5251   | 0.3815         | 1.376   | 0.262        |
| Cumbria         | Intercept      | 57.133   | 8.359          | 6.835   | 0.00641 **   |
| Cumbria         | Linear term    | -10.504  | 20.476         | -0.513  | 0.64334      |
| Cumbria         | Quadratic term | 50.827   | 20.476         | 2.482   | 0.08909      |
| Devon           | Intercept      | 15.4333  | 0.4471         | 34.521  | 5.34e-05 *** |
| Devon           | Linear term    | -2.1477  | 1.0951         | -1.961  | 0.145        |
| Devon           | Quadratic term | 1.8741   | 1.0951         | 1.711   | 0.186        |
| North Yorkshire | Intercept      | 13.1044  | 0.1001         | 130.929 | 9.82e-07 *** |
| North Yorkshire | Linear term    | -0.1590  | 0.2452         | -0.649  | 0.563        |
| North Yorkshire | Quadratic term | 0.0565   | 0.2452         | 0.230   | 0.833        |

### Daily farm cull capacity and culled cattle

| County          | Coefficient    | Estimate | Standard error | t-value | Pr(> t )     |
|-----------------|----------------|----------|----------------|---------|--------------|
| Aberdeenshire   | Intercept      | 476.671  | 5.505          | 86.592  | 0.000133 *** |
| Aberdeenshire   | Linear term    | 7.053    | 12.309         | 0.573   | 0.624474     |
| Aberdeenshire   | Quadratic term | -21.362  | 12.309         | -1.735  | 0.224788     |
| Cumbria         | Intercept      | 16893    | 1914           | 8.827   | 0.0126 *     |
| Cumbria         | Linear term    | -8239    | 4279           | -1.925  | 0.1941       |
| Cumbria         | Quadratic term | 11503    | 4279           | 2.688   | 0.1150       |
| Devon           | Intercept      | 396.99   | 71.27          | 5.570   | 0.0308 *     |
| Devon           | Linear term    | 137.97   | 159.37         | 0.866   | 0.4779       |
| Devon           | Quadratic term | 10.46    | 159.37         | 0.066   | 0.9536       |
| North Yorkshire | Intercept      | 65.388   | 5.142          | 12.716  | 0.00613 **   |
| North Yorkshire | Linear term    | -4.260   | 11.498         | -0.370  | 0.74657      |
| North Yorkshire | Quadratic term | 7.221    | 11.498         | 0.628   | 0.59415      |

Daily farm cull capacity and culled sheep

| County          | Coefficient    | Estimate | Standard error | t-value | Pr(> t )     |
|-----------------|----------------|----------|----------------|---------|--------------|
| Aberdeenshire   | Intercept      | 787.41   | 13.55          | 58.108  | 0.000296 *** |
| Aberdeenshire   | Linear term    | 24.15    | 30.30          | 0.797   | 0.509072     |
| Aberdeenshire   | Quadratic term | -51.07   | 30.30          | -1.685  | 0.233953     |
| Cumbria         | Intercept      | 69766    | 7747           | 9.005   | 0.0121 *     |
| Cumbria         | Linear term    | -32963   | 17323          | -1.903  | 0.1974       |
| Cumbria         | Quadratic term | 46249    | 17323          | 2.670   | 0.1163       |
| Devon           | Intercept      | 1254.59  | 208.56         | 6.016   | 0.0265 *     |
| Devon           | Linear term    | 440.25   | 466.35         | 0.944   | 0.4448       |
| Devon           | Quadratic term | -28.92   | 466.35         | -0.062  | 0.9562       |
| North Yorkshire | Intercept      | 364.52   | 25.67          | 14.200  | 0.00492 **   |
| North Yorkshire | Linear term    | -26.02   | 57.40          | -0.453  | 0.69476      |
| North Yorkshire | Quadratic term | 34.95    | 57.40          | 0.609   | 0.60450      |

Daily farm cull capacity and culled animals

| County          | Coefficient    | Estimate | Standard error | t-value | Pr(> t )     |
|-----------------|----------------|----------|----------------|---------|--------------|
| Aberdeenshire   | Intercept      | 1264.08  | 19.05          | 66.359  | 0.000227 *** |
| Aberdeenshire   | Linear term    | 31.20    | 42.60          | 0.732   | 0.540085     |
| Aberdeenshire   | Quadratic term | -72.43   | 42.60          | -1.700  | 0.231151     |
| Cumbria         | Intercept      | 86660    | 9661           | 8.970   | 0.0122 *     |
| Cumbria         | Linear term    | -41202   | 21602          | -1.907  | 0.1967       |
| Cumbria         | Quadratic term | 57753    | 21602          | 2.673   | 0.1161       |
| Devon           | Intercept      | 1651.58  | 279.83         | 5.902   | 0.0275 *     |
| Devon           | Linear term    | 578.22   | 625.71         | 0.924   | 0.4530       |
| Devon           | Quadratic term | -18.46   | 625.71         | -0.029  | 0.9791       |
| North Yorkshire | Intercept      | 429.91   | 30.81          | 13.953  | 0.0051 **    |
| North Yorkshire | Linear term    | -30.28   | 68.89          | -0.440  | 0.7032       |
| North Yorkshire | Quadratic term | 42.18    | 68.89          | 0.612   | 0.6027       |

Daily farm cull capacity and culled farms

| County          | Coefficient    | Estimate | Standard error | t-value | Pr(> t )     |
|-----------------|----------------|----------|----------------|---------|--------------|
| Aberdeenshire   | Intercept      | 4.36416  | 0.07573        | 57.625  | 0.000301 *** |
| Aberdeenshire   | Linear term    | 0.15465  | 0.16935        | 0.913   | 0.457534     |
| Aberdeenshire   | Quadratic term | -0.28272 | 0.16935        | -1.669  | 0.236974     |
| Cumbria         | Intercept      | 146.28   | 14.69          | 9.957   | 0.00994 **   |
| Cumbria         | Linear term    | -64.07   | 32.85          | -1.950  | 0.19042      |
| Cumbria         | Quadratic term | 89.27    | 32.85          | 2.718   | 0.11292      |
| Devon           | Intercept      | 4.9127   | 0.6522         | 7.532   | 0.0172 *     |
| Devon           | Linear term    | 1.5908   | 1.4584         | 1.091   | 0.3893       |
| Devon           | Quadratic term | -0.5102  | 1.4584         | -0.350  | 0.7599       |
| North Yorkshire | Intercept      | 1.07402  | 0.07179        | 14.962  | 0.00444 ***  |
| North Yorkshire | Linear term    | -0.06741 | 0.16052        | -0.420  | 0.71535      |
| North Yorkshire | Quadratic term | 0.10291  | 0.16052        | 0.641   | 0.58710      |

Daily farm cull capacity and epidemic length

| County          | Coefficient    | Estimate | Standard error | t-value | Pr(> t )     |
|-----------------|----------------|----------|----------------|---------|--------------|
| Aberdeenshire   | Intercept      | 19.14605 | 0.03402        | 562.751 | 3.16e-06 *** |
| Aberdeenshire   | Linear term    | -0.11385 | 0.07608        | -1.497  | 0.273        |
| Aberdeenshire   | Quadratic term | 0.17971  | 0.07608        | 2.362   | 0.142        |
| Cumbria         | Intercept      | 58.560   | 3.053          | 19.182  | 0.00271 **   |
| Cumbria         | Linear term    | -13.231  | 6.827          | -1.938  | 0.19218      |
| Cumbria         | Quadratic term | 18.209   | 6.827          | 2.667   | 0.11649      |
| Devon           | Intercept      | 15.5158  | 0.4881         | 31.788  | 0.000988 *** |
| Devon           | Linear term    | 0.5149   | 1.0914         | 0.472   | 0.683571     |
| Devon           | Quadratic term | -0.2388  | 1.0914         | -0.219  | 0.847091     |
| North Yorkshire | Intercept      | 13.10217 | 0.10068        | 130.138 | 5.9e-05 ***  |
| North Yorkshire | Linear term    | -0.09452 | 0.22512        | -0.420  | 0.715        |
| North Yorkshire | Quadratic term | 0.14942  | 0.22512        | 0.664   | 0.575        |

### Cull radius and culled cattle

| County          | Coefficient    | Estimate | Standard error | t-value | Pr(> t )     |
|-----------------|----------------|----------|----------------|---------|--------------|
| Aberdeenshire   | Intercept      | 452.565  | 5.916          | 76.502  | 1.75e-17 *** |
| Aberdeenshire   | Linear term    | 327.296  | 15.651         | 20.912  | 3.09e-05 *** |
| Aberdeenshire   | Quadratic term | -68.621  | 15.651         | -4.384  | 0.0118 *     |
| Cumbria         | Intercept      | 26357    | 9328           | 2.825   | 0.0476 *     |
| Cumbria         | Linear term    | -34981   | 24680          | -1.417  | 0.2293       |
| Cumbria         | Quadratic term | 46295    | 24680          | 1.876   | 0.1339       |
| Devon           | Intercept      | 552.3    | 192.1          | 2.876   | 0.0452 *     |
| Devon           | Linear term    | -555.4   | 508.1          | -1.093  | 0.3358       |
| Devon           | Quadratic term | 535.0    | 508.1          | 1.053   | 0.3518       |
| North Yorkshire | Intercept      | 64.595   | 4.122          | 15.670  | 9.69e-05 *** |
| North Yorkshire | Linear term    | -7.034   | 10.906         | -0.645  | 0.554        |
| North Yorkshire | Quadratic term | 2.358    | 10.906         | 0.216   | 0.839        |

### Cull radius and culled sheep

| County          | Coefficient    | Estimate | Standard error | t-value | Pr(> t )     |
|-----------------|----------------|----------|----------------|---------|--------------|
| Aberdeenshire   | Intercept      | 742.44   | 10.23          | 72.568  | 2.16e-07 *** |
| Aberdeenshire   | Linear term    | 576.93   | 27.07          | 21.314  | 2.87e-05 *** |
| Aberdeenshire   | Quadratic term | -170.88  | 27.07          | -5.205  | 0.00649 **   |
| Cumbria         | Intercept      | 106934   | 36204          | 2.954   | 0.0418 *     |
| Cumbria         | Linear term    | -138863  | 95788          | -1.450  | 0.2207       |
| Cumbria         | Quadratic term | 183379   | 95788          | 1.914   | 0.1281       |
| Devon           | Intercept      | 1695.3   | 552.9          | 3.066   | 0.0374 *     |
| Devon           | Linear term    | -1556.3  | 1462.8         | -1.064  | 0.3473       |
| Devon           | Quadratic term | 1492.8   | 1462.8         | 1.020   | 0.3652       |
| North Yorkshire | Intercept      | 360.71   | 21.36          | 16.886  | 7.21e-05 *** |
| North Yorkshire | Linear term    | -42.44   | 56.52          | -0.751  | 0.494        |
| North Yorkshire | Quadratic term | 11.88    | 56.52          | 0.210   | 0.844        |

### Cull radius and culled animals

| County          | Coefficient    | Estimate | Standard error | t-value | Pr(> t )     |
|-----------------|----------------|----------|----------------|---------|--------------|
| Aberdeenshire   | Intercept      | 1195.00  | 15.89          | 75.186  | 1.88e-07 *** |
| Aberdeenshire   | Linear term    | 904.23   | 42.05          | 21.503  | 2.77e-05 *** |
| Aberdeenshire   | Quadratic term | -209.51  | 42.05          | -4.982  | 0.00759 **   |
| Cumbria         | Intercept      | 133291   | 45533          | 2.927   | 0.0429 *     |
| Cumbria         | Linear term    | -173843  | 120468         | -1.443  | 0.2225       |
| Cumbria         | Quadratic term | 229674   | 120468         | 1.907   | 0.1293       |
| Devon           | Intercept      | 2247.6   | 744.9          | 3.017   | 0.0939 *     |
| Devon           | Linear term    | -2111.7  | 1970.9         | -1.071  | 0.3443       |
| Devon           | Quadratic term | 2027.8   | 1970.9         | 1.029   | 0.3617       |
| North Yorkshire | Intercept      | 425.31   | 25.48          | 16.692  | 7.55e-05 *** |
| North Yorkshire | Linear term    | -49.47   | 67.41          | -0.734  | 0.504        |
| North Yorkshire | Quadratic term | 14.24    | 67.41          | 0.211   | 0.843        |

### Cull radius and culled farms

| County          | Coefficient    | Estimate | Standard error | t-value | Pr(> t )     |
|-----------------|----------------|----------|----------------|---------|--------------|
| Aberdeenshire   | Intercept      | 4.10233  | 0.07631        | 53.758  | 7.17e-07 *** |
| Aberdeenshire   | Linear term    | 2.77121  | 0.20190        | 13.726  | 0.000163 *** |
| Aberdeenshire   | Quadratic term | -1.08836 | 0.20190        | -5.391  | 0.005728 **  |
| Cumbria         | Intercept      | 216.75   | 66.53          | 3.258   | 0.0311 *     |
| Cumbria         | Linear term    | -281.10  | 176.02         | -1.597  | 0.1855       |
| Cumbria         | Quadratic term | 344.92   | 176.02         | 1.960   | 0.1216       |
| Devon           | Intercept      | 6.142    | 1.600          | 3.838   | 0.0185 *     |
| Devon           | Linear term    | -4.442   | 4.234          | -1.049  | 0.3533       |
| Devon           | Quadratic term | 3.791    | 4.234          | 0.895   | 0.4212       |
| North Yorkshire | Intercept      | 1.06540  | 0.05641        | 18.885  | 4.63e-05 *** |
| North Yorkshire | Linear term    | -0.11789 | 0.14926        | -0.790  | 0.474        |
| North Yorkshire | Quadratic term | 0.03594  | 0.14926        | 0.241   | 0.822        |

Cull radius and epidemic length

| County          | Coefficient    | Estimate | Standard error | t-value | Pr(> t )     |
|-----------------|----------------|----------|----------------|---------|--------------|
| Aberdeenshire   | Intercept      | 19.3774  | 0.2035         | 95.205  | 7.3e-08 ***  |
| Aberdeenshire   | Linear term    | -0.9575  | 0.5385         | -1.778  | 0.1500       |
| Aberdeenshire   | Quadratic term | 1.2082   | 0.5385         | 2.244   | 0.0883       |
| Cumbria         | Intercept      | 73.39    | 12.53          | 5.858   | 0.00424 **   |
| Cumbria         | Linear term    | -65.71   | 33.14          | -1.983  | 0.11844      |
| Cumbria         | Quadratic term | 76.55    | 33.14          | 2.310   | 0.08206      |
| Devon           | Intercept      | 16.532   | 1.096          | 15.086  | 0.000113 *** |
| Devon           | Linear term    | -5.087   | 2.899          | -1.755  | 0.154181     |
| Devon           | Quadratic term | 3.370    | 2.899          | 1.162   | 0.309709     |
| North Yorkshire | Intercept      | 13.09180 | 0.08042        | 162.797 | 8.54e-09 *** |
| North Yorkshire | Linear term    | -0.18828 | 0.21277        | -0.885  | 0.426        |
| North Yorkshire | Quadratic term | 0.05781  | 0.21277        | 0.272   | 0.799        |
