# Supplementary material for: Modeling target-density-based cull strategies to contain foot-and-mouth disease outbreaks
Source: PeerJ journal article supplement (doi:10.7717/peerj.16998), 2024-02-29
Supplement: TableS3.pdf [file TableS3.pdf]

Effect of cull radius averaged over all daily farm cull capacities

| County          | Cull radius (km) | Outbreaks where culled farms >1 |
|-----------------|------------------|---------------------------------|
| Aberdeenshire   | 0                | 1712 (34.2)                     |
| Aberdeenshire   | 0.5              | 9868 (32.9)                     |
| Aberdeenshire   | 1                | 9971 (33.2)                     |
| Aberdeenshire   | 2                | 10129 (33.8)                    |
| Aberdeenshire   | 3                | 10084 (33.6)                    |
| Aberdeenshire   | 4                | 10066 (33.6)                    |
| Aberdeenshire   | 5                | 10093 (33.6)                    |
| Cumbria         | 0                | 2933 (58.7)                     |
| Cumbria         | 0.5              | 17826 (59.4)                    |
| Cumbria         | 1                | 17712 (59.0)                    |
| Cumbria         | 2                | 17672 (58.9)                    |
| Cumbria         | 3                | 17870 (59.6)                    |
| Cumbria         | 4                | 17899 (59.7)                    |
| Cumbria         | 5                | 17997 (60.0)                    |
| Devon           | 0                | 2512 (50.2)                     |
| Devon           | 0.5              | 14883 (49.6)                    |
| Devon           | 1                | 14746 (49.2)                    |
| Devon           | 2                | 14719 (49.1)                    |
| Devon           | 3                | 14736 (49.1)                    |
| Devon           | 4                | 14845 (49.5)                    |
| Devon           | 5                | 14844 (49.5)                    |
| North Yorkshire | 0                | 2403 (48.1)                     |
| North Yorkshire | 0.5              | 14467 (48.2)                    |
| North Yorkshire | 1                | 14769 (49.2)                    |
| North Yorkshire | 2                | 14649 (48.8)                    |
| North Yorkshire | 3                | 14622 (48.7)                    |
| North Yorkshire | 4                | 14589 (48.6)                    |
| North Yorkshire | 5                | 14379 (47.9)                    |

Effect of daily farm cull capacity averaged over all cull radii

| County          | Capacity (farms/day) | Outbreaks where culled farms > 1 |
|-----------------|----------------------|----------------------------------|
| Aberdeenshire   | 5                    | 12247 (33.1)                     |
| Aberdeenshire   | 10                   | 12441 (33.62)                    |
| Aberdeenshire   | 20                   | 12476 (33.72)                    |
| Aberdeenshire   | 100                  | 12361 (33.41)                    |
| Aberdeenshire   | Unlimited            | 12398 (33.51)                    |
| Cumbria         | 5                    | 22076 (59.66)                    |
| Cumbria         | 10                   | 21887 (59.15)                    |
| Cumbria         | 20                   | 22063 (59.63)                    |
| Cumbria         | 100                  | 21975 (59.39)                    |
| Cumbria         | Unlimited            | 21908 (59.21)                    |
| Devon           | 5                    | 18305 (49.47)                    |
| Devon           | 10                   | 18139 (49.02)                    |
| Devon           | 20                   | 18391 (49.71)                    |
| Devon           | 100                  | 18293 (49.44)                    |
| Devon           | Unlimited            | 18157 (49.07)                    |
| North Yorkshire | 5                    | 18068 (48.83)                    |
| North Yorkshire | 10                   | 17938 (48.48)                    |
| North Yorkshire | 20                   | 18048 (48.78)                    |
| North Yorkshire | 100                  | 17806 (48.12)                    |
| North Yorkshire | Unlimited            | 18018 (48.7)                     |
